# Supplementary material for: Revealing Silicon’s Delithiation Behaviour through Empirical Analysis of Galvanostatic Charge–Discharge Curves
Source: MDPI journal article supplement (doi:10.3390/batteries9050251), 2023-04-27
Supplement: s1 [file s1]

## Supporting Information

### Revealing silicon's delithiation behaviour through empirical analysis of galvanostatic charge-discharge curves

Frederik T Huld<sup>1,2,†,\*</sup>, Jan Petter Mæhlen<sup>3</sup>, Caroline Keller<sup>4,5</sup>, Samson Y Lai<sup>2,3</sup>, Obinna E Eleri<sup>1,2,†</sup>, Alexey Y Kopusov<sup>3,6\*</sup>, Zhixin Yu<sup>2\*</sup>, and Fengliu Lou<sup>1,\*</sup>

- 1 Beyonder, Stokkamyrveien 30, N-4313, Sandnes (Norway)
- 2 Department of Energy and Petroleum Engineering, University of Stavanger, Kjølvs Egelands hus, Kristine Bonnevis vei, 4021, Stavanger (Norway)
- 3 Department of Battery Technology, Institute for Energy Technology (IFE) Instituttveien 18, 2007, Kjeller (Norway)
- 4 Univ. Grenoble Alpes, CEA, CNRS, IRIG, SYMMES, 38000, Grenoble (France)
- 5 Univ. Grenoble Alpes, CEA, LITEN, DEHT, 38000, Grenoble (France)
- 6 Center for Materials Science and Nanotechnology, Department of Chemistry, P.O. Box 1033, Blindern, 0371, Oslo (Norway)

Correspondence:

frederik@beyonder.no (F.T.H.)

alexey.kopusov@kjemi.uio.no (A.Y.K.)

zhixin.yu@uis.no (Z.Y.)

fengliu@beyonder.no (F.L.)

† Current address: Affiliation 2.

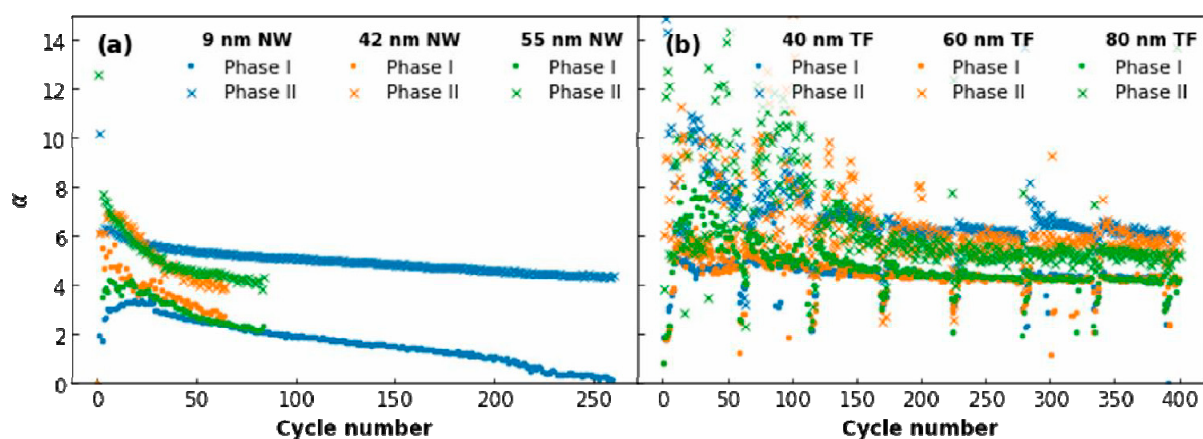

Figure S1 – The skew parameter  $\alpha$  for phases I and II for (a) NWs and (b) TFs, as a function of the cycle life.

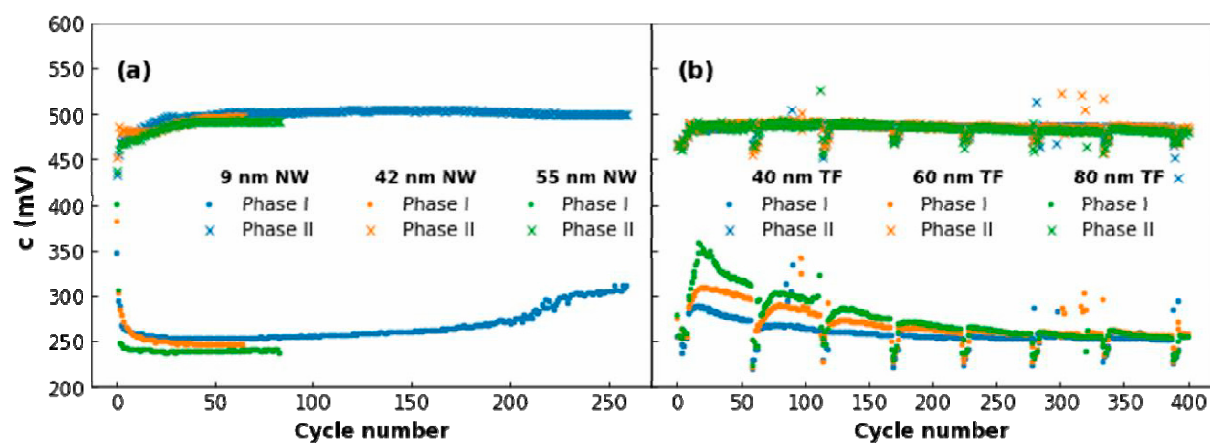

Figure S2 – The equilibrium potential  $c$  for phases I and II for (a) NWs and (b) TFs, plotted as a function of the cycle life.

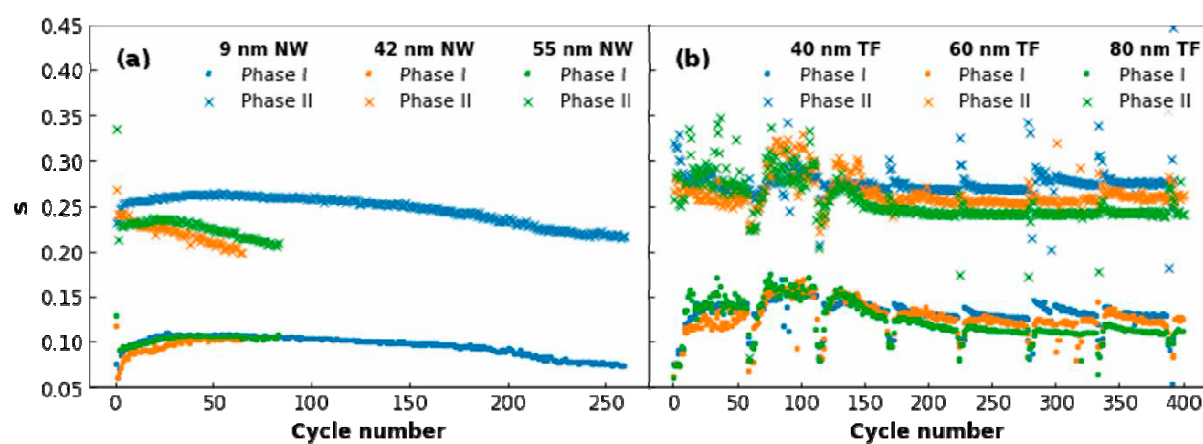

Figure S3 – The scale parameter  $s$  of the Gaussian component for phases I and II for (a) NWs and (b) TFs, plotted as a function of the cycle life

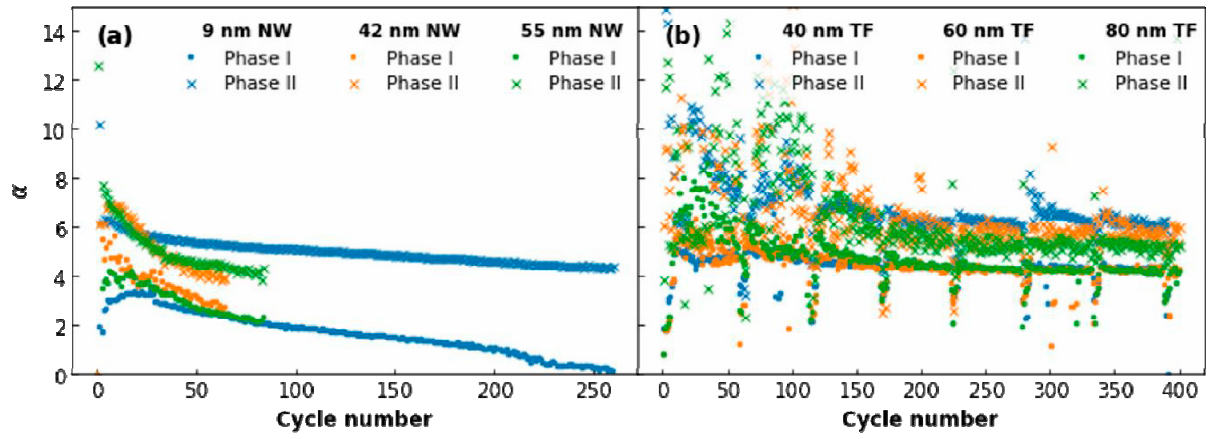

Figure S4 – The scale parameter  $\gamma$  of the Lorentzian component for phase I for (a) NWs and (b) TFs, plotted as a function of the cycle life

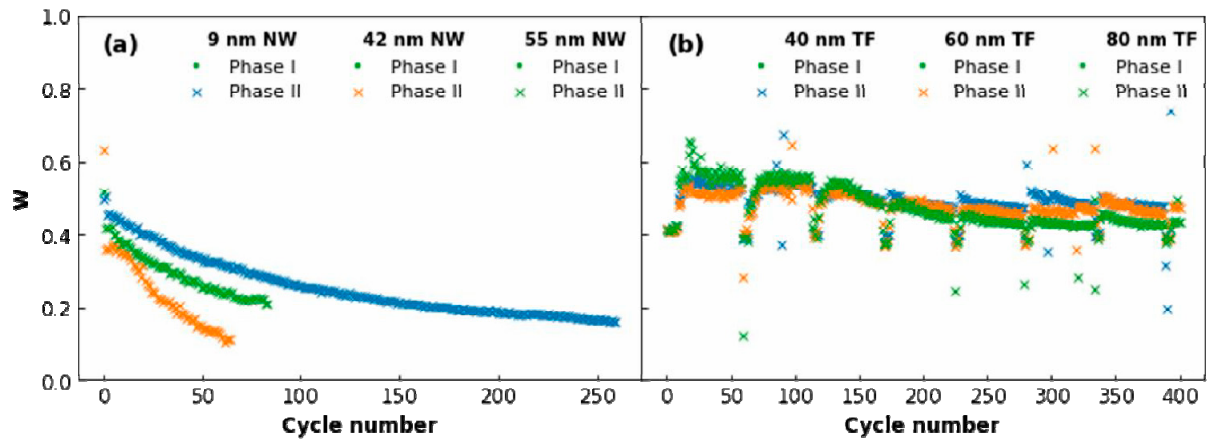

Figure S5 – The weighting parameter  $w$  for phases I and II for (a) NWs and (b) TFs, as a function of the cycle life
